# Supplementary material for: Porous g-C3N4 covered MOF-derived nanocarbon materials for high-performance supercapacitors
Source: Royal Society of Chemistry journal article supplement (doi:10.1039/c9ra09254d), 2019-01-01
Supplement: c9ra09254d1.pdf [file c9ra09254d1.pdf]

## Electronic Supplementary Material

### Porous $g\text{-C}_3\text{N}_4$ covered MOF-derived nanocarbon materials for high-performance supercapacitors

#### Additional Fig.s and Results

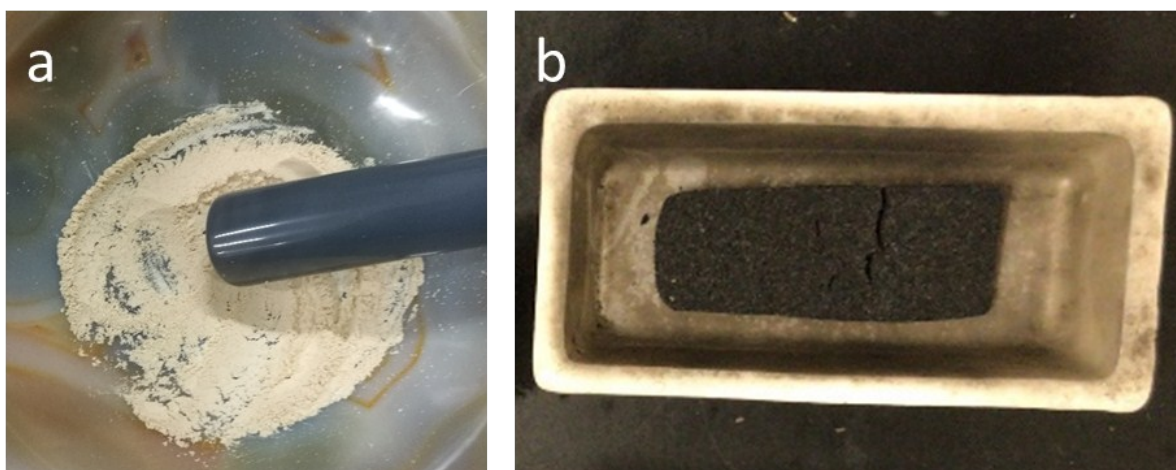

**Fig. S1** Optical images of  $g\text{-C}_3\text{N}_4$  and PMGCN nanocomposite.

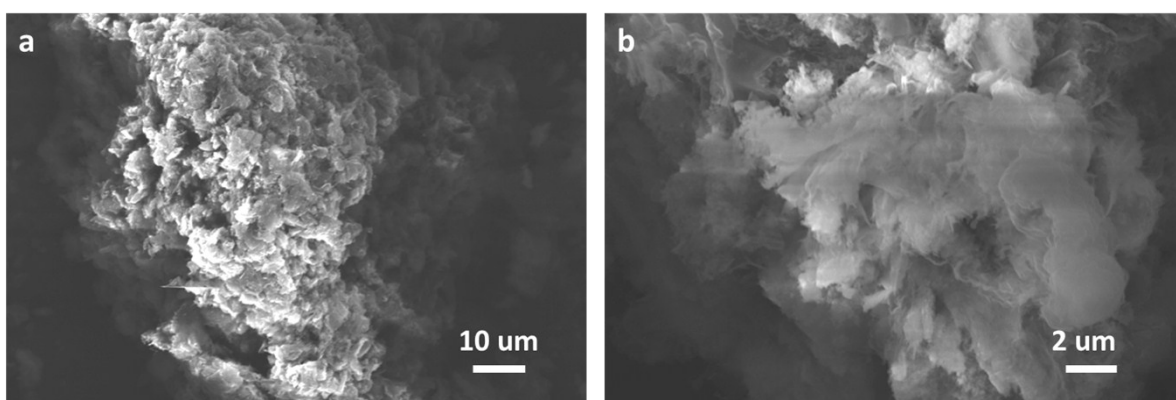

**Fig. S2** SEM images of  $g\text{-C}_3\text{N}_4$  at different magnifications.

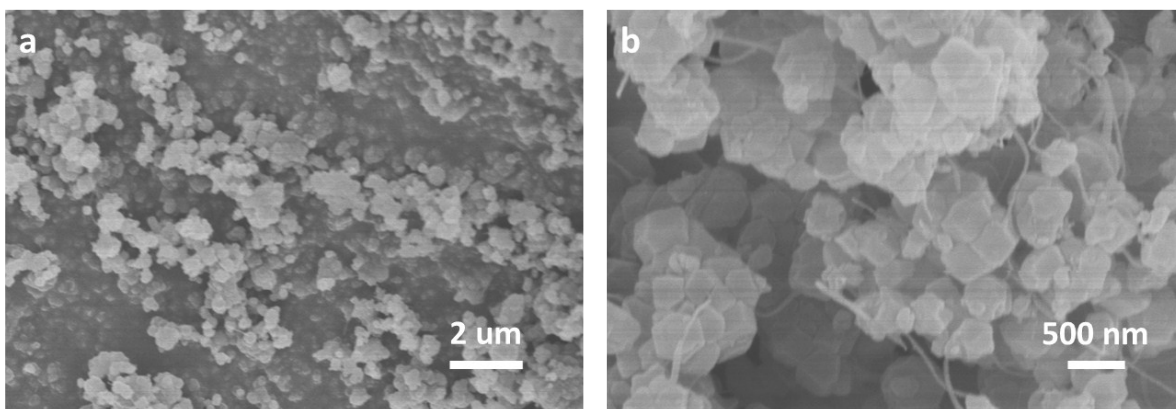

**Fig. S3** SEM images of ZIF-8 at different magnifications.

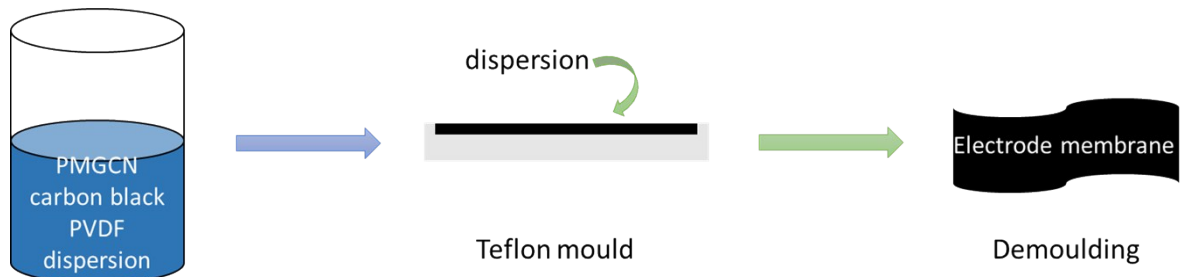

**Fig. S4** Fabrication process of electrode membrane.
